# Supplementary material
Source: PubMed Central journal article supplement (PMC7375895)
Supplement: NIHMS1584138-supplement-1.pdf [file NIHMS1584138-supplement-1.pdf]

**Appendix**  
**Volunteering and Subsequent Health and Well-being in Older Adults:**  
**An Outcome-wide Longitudinal Approach**  
**Kim et al.**

**Appendix Text 1.** Assessment of Outcomes

**Appendix Text 2.** Proof Illustrating How Controlling for Pre-Baseline Levels of Volunteering Can Help Us Evaluate How “Change” in Volunteering is Associated with Subsequent Health and Well-Being Outcomes Over Time

**Appendix Text 3.** Considering Causes of Death

**Appendix Table 1.** Volunteering and Subsequent Health and Well-being (Health and Retirement Study [HRS]: N=12,998; 5 Categories of Volunteering)

**Appendix Table 2.** Change in Volunteering from the Pre-Baseline Wave (t0) to the Baseline Wave (t1)

**Appendix Table 3.** Volunteering and Subsequent Health and Well-being (After Adjustment for Conventional Covariates or All Covariates; Health and Retirement Study [HRS]: N=12,998)

**Appendix Table 4.** Complete-Case Analyses: Volunteering and Subsequent Health and Well-being (Health and Retirement Study [HRS]: N ranged from: 5,581 to 8,474)

**Appendix Table 5.** Volunteering and Subsequent All-Cause Mortality (Table Displaying Coefficient Estimates for All Covariates [HRS]: N=12,998)

## **APPENDIX TEXT 1. ASSESSMENT OF OUTCOMES**

### **Reference Group**

Unless otherwise noted, the reference group was the healthiest group for all binary outcomes.

### **Physical Health**

**All-cause mortality.** Information about death was obtained up to the 2016 questionnaire wave via two methods. First, an exit interview was conducted with next-of-kin. Then, after each wave of data collection, the National Death Index (NDI) was searched for death information. When comparing deaths reported by NDI versus exit interviews, there is a 95.5% match.<sup>1</sup>

**Chronic conditions.** Participants self-reported whether they were ever told by a healthcare provider that they had (yes/no) the following conditions: (1) diabetes, (2) hypertension, (3) stroke, (4) cancer, (5) heart disease, (6) lung disease, or (7) arthritis. Validity and reliability of self-reported chronic conditions has previously been demonstrated in HRS.<sup>2</sup>

**Overweight/obesity.** BMI was derived based on self-reported height and weight, and BMI was calculated as weight/height<sup>2</sup> (kg/m<sup>2</sup>). A BMI of  $\geq 25$  kg/m<sup>2</sup> was considered as overweight/obese.<sup>3</sup>

**Number of chronic conditions.** To create a number of chronic conditions score, a summary score was calculated by summing the number of reported conditions (e.g., the 7 chronic conditions and also overweight/obesity; range=0 to 8).

**Appendix**  
**Volunteering and Subsequent Health and Well-being in Older Adults:**  
**An Outcome-wide Longitudinal Approach**  
**Kim et al.**

**Cognitive function problem.** The HRS cognitive function assessment,<sup>4,5</sup> was adapted from the modified Telephone Interview for Cognitive Status (TICS-M). The assessment is a 27-point scale that included an immediate and delayed 10-noun free recall test, a serial 7 subtraction test, and a backward count 20 test. This assessment tool has been shown to have high sensitivity and specificity for cognitive impairment in older adults; the cutpoints were derived from previous research conducted on cognitive impairment in HRS.<sup>6,7</sup> Respondents scoring 0–11 on the 27-point scale were classified as having “cognitive impairment,” while those scoring  $\geq 12$  were classified as “normal” (the reference group). More detailed information about the cognitive assessments can be found in HRS reports.<sup>4,5</sup>

**Physical functioning limitations.** Physical functioning limitations was assessed using items adapted from scales developed by Rosow and Breslau (1966), Nagi (1976), Katz, Ford, Moskowitz, Jackson, and Jaffe (1963), and Lawton and Brody (1969).<sup>8–11</sup> Participants were defined as having physical function limitations if they reported  $\geq 4$  limitations with physical functioning (i.e., walking several blocks, climbing one flight of stairs, pushing or pulling large objects, lifting or carrying 10 pounds, getting up from a chair, reaching or extending arms up, stooping, kneeling, or crouching, sitting for 2 hours) or activities of daily living (i.e., walking across a room, dressing, eating, bathing, getting in/out bed, using the toilet). Those reporting  $< 4$  limitations were considered “normal” in the physical function domain and also served as the reference group. This criterion was determined by identifying the physical function score where 75% of participants could be considered as having healthy physical function at baseline.

**Appendix**  
**Volunteering and Subsequent Health and Well-being in Older Adults:**  
**An Outcome-wide Longitudinal Approach**  
**Kim et al.**

**Chronic pain.** Chronic pain was assessed by asking respondents (*yes/no*): *Are you often troubled with pain?* No pain was the reference group.

**Self-rated health.** On a 5-point scale (reverse coded so that higher scores reflected higher self-rated health), participants were asked *Would you say your health is excellent, very good, good, fair, or poor?*

### **Health Behaviors**

**Binge drinking.** Participants reported whether they ever had alcoholic beverages, and those who responded affirmatively were asked a second question: *In the last three months, on how many days have you had four or more drinks on one occasion.* Those who reported binge drinking on at least one day were considered as ever binge drinkers, whereas those who reported never binge drinking, or never drinking, were considered non-binge drinkers (the reference group).

**Smoking.** Current smoking status was assessed by asking participants: *Do you smoke cigarettes now?* The response categories included *yes* or *no* (with *no* smoking as the reference group).

**Frequent physical activity.** Based on prior research, a binary physical activity variable was created where  $\geq 1$ x/week of vigorous or moderate exercise was considered frequent physical activity and  $< 1$ x/week of vigorous or moderate exercise was the reference group.<sup>12</sup> Physical activity was measured by asking participants their frequency of engaging in vigorous (e.g., running, swimming, aerobics), moderate (e.g., gardening, dancing, walking at a moderate pace), and light (e.g., vacuuming, laundry) activities over the past 12 months. Response categories included daily,  $> 1$ x/week, 1x/week, 1-3x/month, hardly ever or never.

**Appendix**  
**Volunteering and Subsequent Health and Well-being in Older Adults:**  
**An Outcome-wide Longitudinal Approach**  
**Kim et al.**

**Sleep problems.** Participants completed the 4-item Jenkins Sleep Questionnaire, a validated and widely used screening instrument for sleep complaints, querying insomnia symptoms.<sup>13</sup> Potential response options included *most of the time, sometimes, and rarely or never*. Healthy sleep and having *no sleep problems* was defined as reporting *rarely or never* for all four insomnia symptoms assessed. People were categorized as having sleep problems if they responded *most of the time* to any of the items, and then the final results were reverse coded. No sleep problems was the reference group. This sleep questionnaire was only administered every other wave, thus it was only assessed in half the sample and sleep problems data was imputed for the other half of the sample. Comparing estimates between the imputed and complete-case analyses showed very similar estimates.

**Psychological Well-Being**

**Positive affect.** Positive affect was measured (in 2006 only) with a 6-item scale<sup>14-16</sup> originally developed for use in the Midlife in the United States Study. The scale assessed how often the participant felt *cheerful, in good spirits, extremely happy, calm and peaceful, satisfied, and full of life* over the past 30 days. Response categories ranged from 1 (all of the time) to 5 (none of the time). Responses were reverse scored, so that a higher score indicated higher positive affect. An overall score was derived by averaging responses across all 6 items ( $\alpha=0.91$ , range=1 to 5). After the 2006 wave, the HRS switched to a more expansive measure of positive affect based on the Positive and Negative Affect Schedule (PANAS-X).<sup>17</sup> It included the following 13 items: determined, enthusiastic, active, proud, interested, happy, attentive, content, inspired, hopeful, alert, calm, excited. An overall score was derived by averaging responses across all 13 items ( $\alpha=0.92$ , range=1 to 5). A limitation of this study is that affect was measured in a different way

**Appendix**  
**Volunteering and Subsequent Health and Well-being in Older Adults:**  
**An Outcome-wide Longitudinal Approach**  
**Kim et al.**

during only the first wave of the study. However, scores were standardized and both the prior and current measures of affect operate very similarly (e.g., similar correlations with other variables, similar pattern of descriptive statistics).

**Life satisfaction.** Life satisfaction was assessed with the 5-item Satisfaction with Life Scale (e.g., *In most ways my life is close to ideal*).<sup>18</sup> The scale has shown excellent psychometric properties in prior work. Response categories ranged from 1 (strongly disagree) to 7 (strongly agree). An overall score was derived by averaging responses across all 5 items, with a higher score indicating higher life satisfaction ( $\alpha=0.88$ , range=1 to 7).

**Optimism.** Optimism was assessed using the Life Orientation Test-Revised (LOT-R). The measure has good discriminant and convergent validity, and good reliability.<sup>19</sup> Using a 6-point Likert scale (from 1 [strongly disagree] to 6 [strongly agree]), participants were asked the degree to which they agreed with six statements such as, *In uncertain times, I usually expect the best*. After reverse coding negatively worded items, all items were averaged together to create a composite score, with higher scores indicating higher optimism ( $\alpha=0.75$ , range=1 to 6).

**Purpose in life.** Purpose in life was measured with a 7-item purpose in life subscale from the Ryff's Psychological Well-Being Scale<sup>20</sup> (e.g., *I have a sense of direction and purpose in my life*.) The 7-item subscale has been validated in prior work, and has shown good psychometric properties.<sup>21</sup> Response categories ranged from 1 (strongly disagree) to 6 (strongly agree). Responses were reverse scored for some negatively-worded items, so that a higher score

**Appendix**  
**Volunteering and Subsequent Health and Well-being in Older Adults:**  
**An Outcome-wide Longitudinal Approach**  
**Kim et al.**

indicated higher purpose. An overall score was derived by averaging the responses across all items ( $\alpha=0.77$ , range=1 to 6).

**Mastery.** Mastery was measured with 5-items derived from Lachman and Weaver (1998) and rated on a scale from 1 (strongly disagree) to 6 (strongly agree). The measure has good discriminant and convergent validity, as well as good reliability.<sup>22</sup> Participants were asked the degree to which they agreed with five statements such as, *I can do just about anything I really set my mind to*. All items were averaged together to create a composite score, with higher scores indicating higher mastery ( $\alpha=0.89$ , range=1 to 6).

**Perceived constraints on personal control.** Perceived constraints on personal control was measured with 5 other items derived from Lachman and Weaver (1998) and rated on a scale from 1 (strongly disagree) to 6 (strongly agree). The measure has good discriminant and convergent validity, as well as good reliability.<sup>22</sup> Participants were asked the degree to which they agreed with five statements such as, *What happens in my life is often beyond my control*. All items were averaged together to create a composite score, with higher scores indicating higher perceived constraints on personal control ( $\alpha=0.87$ , range=1 to 6).

**Health mastery.** On a 0 to 10 scale where 0 means *no control at all* and 10 means *very much control*, participants were asked, *how would you rate the amount of control you have over your health these days?*

**Appendix**  
**Volunteering and Subsequent Health and Well-being in Older Adults:**  
**An Outcome-wide Longitudinal Approach**  
**Kim et al.**

**Financial mastery.** On a 0 to 10 scale where 0 means *no control at all* and 10 means *very much control*, participants were asked, *how would you rate the amount of control you have over your financial situation these days?*

**Psychological Distress**

**Depressive symptoms and depression.** Depressive symptoms over the past week were measured using the 8-item Center for Epidemiologic Studies Depression Scale (CESD)<sup>23</sup> (e.g., *Much of the time during the past week, I felt depressed*), and response options included *yes* or *no* for each item. Following HRS protocol, an overall score was derived ranging from 0 to 8, with a higher score indicating higher depressive symptoms. The scale has been previously validated in the Health and Retirement Study,<sup>24</sup> and showed high reliability in this sample ( $\alpha=0.80$ ). Following prior work,<sup>24</sup> participants with a score of  $\geq 4$  were considered as having significant depressive symptoms, or depression. Prior work suggested that the cutoff of 4 would produce comparable results as the 16 symptoms cutoff when using the full 20-item CESD scale.<sup>24</sup> No depression was the reference group.

**Hopelessness.** Hopelessness was measured with 4 questionnaire items from two previously validated scales.<sup>25,26</sup> (e.g., *I feel it is impossible for me to reach the goals that I would like to strive for*, *The future seems hopeless to me and I can't believe that things are changing for the better*). Response categories ranged from 1 (strongly disagree) to 6 (strongly agree). An overall score was created by averaging the responses across all items ( $\alpha=0.86$ , range=1 to 6).

**Negative affect.** Negative affect was measured (in 2006 only) with a 6-item scale originally developed for use in the Midlife in the United States Study.<sup>14-16</sup> The scale assessed how often the

**Appendix**  
**Volunteering and Subsequent Health and Well-being in Older Adults:**  
**An Outcome-wide Longitudinal Approach**  
**Kim et al.**

participant felt *so depressed that nothing could cheer you up, hopeless, restless or fidgety, that everything was an effort, worthless, and nervous* over the past 30 days. Response categories ranged from 1 (all of the time) to 5 (none of the time). Responses were reverse scored, so that a higher score indicated higher negative affect. An overall score was derived by averaging responses across all 6 items ( $\alpha=0.89$ , range=1 to 5). After the 2006 wave, the HRS switched to a more expansive measure of negative affect based on the Positive and Negative Affect Schedule (PANAS-X).<sup>17</sup> It included the following 12 items: afraid, upset, guilty, scared, frustrated, bored, hostile, jittery, ashamed, nervous, sad, distressed. An overall score was derived by averaging responses across all 12 items ( $\alpha=0.90$ , range=1 to 5). A limitation of this study is that affect was measured in a different way during only the first wave of the study. However, scores were standardized and both the prior and current measures of affect operate very similarly (e.g., similar correlations with other variables, similar pattern of descriptive statistics).

### **Social Factors**

**Loneliness.** Loneliness was measured with three items from the previously validated UCLA Loneliness Scale<sup>27</sup> (i.e., How much of the time do you feel: [1] you lack companionship, [2] left out, and [3] isolated from others.) Response categories ranged from 1 (often) to 3 (hardly ever or never). Responses were reverse scored, so that a higher score indicated higher loneliness. An overall score was derived by averaging the responses across the three items ( $\alpha=0.82$ , range=1 to 3).

**Frequency of contact with: children, other family, and friends.** Frequency of contact with children, other family, or friends was each queried separately, but in the same way. For example, participants were asked: *On average, how often do you do each of the following? (1) Meet up*

**Appendix**  
**Volunteering and Subsequent Health and Well-being in Older Adults:**  
**An Outcome-wide Longitudinal Approach**  
**Kim et al.**

(include both arranged and chance meetings), (2) *Speak on the phone*, (3) *Write or email*. For each of these 3 categories of questions, HRS respondents had the option of choosing 1 of the following 6 responses: (1)  $\geq 3$ x/week, (2) 1x–2x/week, (3) 1x–2x/month, (4) every few months, (5) 1x–2x/year, (6)  $< 1$ x/year or never.<sup>28</sup> Because contact of any kind (regardless of medium) was the main point of interest, the highest value on any of the three modes of contact (e.g., meet up, phone, write/email) was taken. In other words, if the respondent did not meet in person very often with the other person but spoke on the phone very often with that person, contact was operationalized as fairly common, given that they speak on the phone very often. Contact  $\geq 1$ x/week was the reference group.

**Other Factors**

**Personality.** The “Big-5” personality traits (openness to experience, conscientiousness, extraversion, agreeableness, and neuroticism) were measured using 26 items derived from the Midlife Development Inventory Personality scales (MIDI) and International Personality Item Pool (IPIP). Using existing trait inventories, the goal of MIDI was to create the shortest possible collection of items that measured the Big-Five personality traits with high validity and reliability. In a pilot study conducted among a probability sample of 1,000 adults aged 30–70 years, items with the highest item-to-total correlations and factor loadings were selected for the MIDI. Forward regressions were then computed to determine the smallest number of items needed to account for more than 90% of the total scale variance. As an illustrative example, items on the conscientiousness scale included *organized*, *responsible*, *hardworking*, and *careless*. Response categories ranged from 1 (a lot) to 4 (not at all). Responses were reverse scored, so that a higher score indicated higher indication of a given personality trait. An overall score for each

**Appendix**  
**Volunteering and Subsequent Health and Well-being in Older Adults:**  
**An Outcome-wide Longitudinal Approach**  
**Kim et al.**

personality trait was derived by averaging responses across all items of a given Big-5 Personality variable.

**APPENDIX TEXT 2. PROOF ILLUSTRATING HOW CONTROLLING FOR PRE-BASELINE LEVELS OF VOLUNTEERING CAN HELP US EVALUATE HOW “CHANGE” IN VOLUNTEERING IS ASSOCIATED WITH SUBSEQUENT HEALTH AND WELL-BEING OUTCOMES OVER TIME**

Let  $Y$  be the outcome in 2014/2016,  $A_1$  the volunteering exposure in 2010/2012,  $A_0$  the volunteering exposure in 2006/2008,  $C$  the set of covariates in 2006/2008. For a continuous outcome, the regression model is:  $E[Y|a_0, a_1, c] = v + b_0a_0 + b_1a_1 + b_2'c$

Let  $Y_a$  denote the potential outcome for  $Y$  for an individual under an intervention to set  $A_1$  to  $a$ . For an individual with baseline volunteering exposure  $A_0=a_0$  and covariates  $c$  in 2006/2008, under the no-confounding (and positivity and consistency) and modeling assumptions, a change in volunteering of  $d$  points  $A_0=a_0$  to  $A_1=a_0+d$  in 2010/2012, rather than maintaining volunteering of  $A_1=a_0$  in 2010/2012, will give rise to an effect (a difference in potential outcomes for  $Y$ ) of:

$$\begin{aligned} & E[Y_{a_0+d} | A_0=a_0, c] - E[Y_{a_0} | A_0=a_0, c] \\ &= E[Y_{a_0+d} | A_1=a_0+d, A_0=a_0, c] - E[Y_{a_0} | A_1=a_0, A_0=a_0, c] \\ &= E[Y | A_1=a_0+d, A_0=a_0, c] - E[Y | A_1=a_0, A_0=a_0, c] \\ &= [v + b_0a_0 + b_1(a_0+d) + b_2'c] - [v + b_0a_0 + b_1a_0 + b_2'c] \\ &= b_1d \end{aligned}$$

where the first equality follows by the no-confounding assumption, the second by consistency, and the third by the statistical model.

### **SUPPLEMENTARY TEXT 3. CONSIDERING CAUSES OF DEATH**

The idea of creating aggregate measures that combined both incidence of a condition and death due to that condition was considered. However, out of the 14 ways in which HRS categorizes causes of death, very few categories cleanly mapped onto health conditions that were considered in this study without substantial risk of misclassification error. Thus, this option was not pursued.

The causes of death included deaths due to: (1) Musculoskeletal system and connective tissue; (2) Heart, circulatory and blood conditions; (3) Allergies; hay fever; sinusitis; tonsillitis; (4) Endocrine, metabolic and nutritional conditions; (5) Digestive system (stomach, liver, gallbladder, kidney, bladder); (6) Neurological and sensory conditions; (7) Reproductive system and prostate conditions; (8) Emotional and psychological conditions; (9) Miscellaneous; (10) Other symptoms; (11) Not a health condition; (12) None; (13) Other health condition; (14) Cancers and tumors; skin conditions)

**Appendix**  
**Volunteering and Subsequent Health and Well-being in Older Adults:**  
**An Outcome-wide Longitudinal Approach**  
**Kim et al.**

## APPENDIX REFERENCES

1. Weir DR. Validating mortality ascertainment in the Health and Retirement Study. Ann Arbor, MI: University of Michigan Institute for Social Research. [https://hrs.isr.umich.edu/sites/default/files/biblio/Weir\\_mortality\\_ascertainment.pdf](https://hrs.isr.umich.edu/sites/default/files/biblio/Weir_mortality_ascertainment.pdf). Published November 3, 2016. Accessed September 28, 2019.
2. Fisher GG, Faul JD, Weir DR, Wallace RB. Documentation of chronic disease measures in the Health and Retirement Study (HRS/AHEAD). Ann Arbor, MI: University of Michigan Institute for Social Research. <http://hrsonline.isr.umich.edu/sitedocs/userg/dr-009.pdf>. Published February 10, 2005. Accessed June 9, 2019.
3. WHO. Physical status: the use and interpretation of anthropometry: report of a WHO expert committee. [https://apps.who.int/iris/bitstream/handle/10665/37003/WHO\\_TRS\\_854.pdf](https://apps.who.int/iris/bitstream/handle/10665/37003/WHO_TRS_854.pdf). Published 1995. Accessed June 9, 2019.
4. Fisher GG, Halimah H, Faul JD, Rogers WL, Weir DR. Health and Retirement Study Imputation of Cognitive Functioning Measures:1992–2014. Ann Arbor, MI: University of Michigan Institute for Social Research. <https://hrs.isr.umich.edu/sites/default/files/biblio/COGIMPdd.pdf>. Published January 13, 2017. Accessed May 19, 2019.
5. Ofstedal MB, Fisher GG, Herzog AR. Documentation of Cognitive Functioning Measures in the Health and Retirement Study. Ann Arbor, MI: University of Michigan Institute for Social Research. <https://hrs.isr.umich.edu/publications/biblio/5620>. Published March, 2005. Accessed May 19, 2019.
6. Crimmins EM, Kim JK, Langa KM, Weir DR. Assessment of cognition using surveys and neuropsychological assessment: the Health and Retirement Study and the Aging, Demographics, and Memory Study. *J Gerontol B Psychol Sci Soc Sci*. 2011;66(suppl 1):i162–i171. <https://doi.org/10.1093/geronb/gbr048>.
7. Langa KM, Plassman BL, Wallace RB, et al. The Aging, Demographics, and Memory Study: study design and methods. *Neuroepidemiology*. 2005;25(4):181–191. <https://doi.org/10.1159/000087448>.
8. Rosow I, Breslau N. A Guttman health scale for the aged. *J Gerontol*. 1966;21(4):556–559. <https://doi.org/10.1093/geronj/21.4.556>.
9. Nagi SZ. An epidemiology of disability among adults in the United States. *Milbank Mem Fund Q Health Soc*. 1976:439–467. <https://doi.org/10.2307/3349677>.
10. Katz S, Ford AB, Moskowitz RW, Jackson BA, Jaffe MW. Studies of illness in the aged: the index of ADL: a standardized measure of biological and psychosocial function. *JAMA*. 1963;185(12):914–919. <https://doi.org/10.1001/jama.1963.03060120024016>.
11. Lawton MP, Brody EM. Assessment of older people: self-maintaining and instrumental activities of daily living. *Gerontologist*. 1969;9(3 Part 1):179–186. [https://doi.org/10.1093/geront/9.3\\_part\\_1.179](https://doi.org/10.1093/geront/9.3_part_1.179).
12. Nandi A, Glymour MM, Subramanian SV. Association among socioeconomic status, health behaviors, and all-cause mortality in the United States. *Epidemiology*. 2014;25(2):170–177. <https://doi.org/10.1097/ede.0000000000000038>.
13. Jenkins CD, Stanton BA, Niemcryn SJ, Rose RM. A scale for the estimation of sleep problems in clinical research. *J Clin Epidemiol*. 1988;41(4):313–321. [https://doi.org/10.1016/0895-4356\(88\)90138-2](https://doi.org/10.1016/0895-4356(88)90138-2).

**Appendix**  
**Volunteering and Subsequent Health and Well-being in Older Adults:**  
**An Outcome-wide Longitudinal Approach**  
**Kim et al.**

14. Watson D, Clark LA, Tellegen A. Development and validation of brief measures of positive and negative affect: the PANAS scales. *J Pers Soc Psychol*. 1988;54(6):1063–1070. <https://doi.org/10.1037/0022-3514.54.6.1063>.
15. Brim OG, Featherman DL. Surveying midlife development in the United States. Unpublished Manuscript. Published 1998.
16. Mroczek DK, Kolarz CM. The effect of age on positive and negative affect: a developmental perspective on happiness. *J Pers Soc Psychol*. 1998;75(5):1333–1349. <https://doi.org/10.1037//0022-3514.75.5.1333>.
17. Watson D, Clark LA. The PANAS-X: manual for the positive and negative affect schedule-expanded form. Published 1994. <https://doi.org/10.17077/48vt-m4t2>.
18. Diener E, Emmons RA, Larsen RJ, Griffin S. The satisfaction with life scale. *J Pers Assess*. 1985;49(1):71–75. [https://doi.org/10.1207/s15327752jpa4901\\_13](https://doi.org/10.1207/s15327752jpa4901_13).
19. Scheier MF, Carver CS, Bridges MW. Distinguishing optimism from neuroticism (and trait anxiety, self-mastery, and self-esteem): a reevaluation of the Life Orientation Test. *J Pers Soc Psychol*. 1994;67(6):1063–1078. <https://doi.org/10.1037/0022-3514.67.6.1063>.
20. Ryff CD, Keyes CLM. The structure of psychological well-being revisited. *J Pers Soc Psychol*. 1995;69(4):719–727. <https://doi.org/10.1037//0022-3514.69.4.719>.
21. Abbott R, Ploubidis G, Huppert F, Kuh D, Wadsworth M, Croudace T. Psychometric evaluation and predictive validity of Ryff’s psychological well-being items in a UK birth cohort sample of women. *Health Qual Life Outcomes*. 2006;4:76. <https://doi.org/10.1186/1477-7525-4-76>.
22. Lachman ME, Weaver SL. The sense of control as a moderator of social class differences in health and well-being. *J Pers Soc Psychol*. 1998;74(3):763–773. <https://doi.org/10.1037//0022-3514.74.3.763>.
23. Radloff LS. The CES-D Scale: a self-report depression scale for research in the general population. *Appl Psychol Meas*. 1977;1(3):385–401. <https://doi.org/10.1177/014662167700100306>.
24. Steffek D. Documentation of affective functioning measures in the Health and Retirement Study. Ann Arbor, MI: University of Michigan Institute for Social Research. <https://hrs.isr.umich.edu/sites/default/files/biblio/dr-005.pdf>. Published 2000. Accessed June 9, 2019.
25. Beck AT, Weissman A, Lester D, Trexler L. The measurement of pessimism: the Hopelessness Scale. *J Consult Clin Psychol*. 1974;42(6):861–865. <https://doi.org/10.1037/h0037562>.
26. Everson SA, Kaplan GA, Goldberg DE, Salonen R, Salonen JT. Hopelessness and 4-year progression of carotid atherosclerosis: the Kuopio Ischemic Heart Disease Risk Factor Study. *Arterioscler Thromb Vasc Biol*. 1997;17(8):1490–1495. <https://doi.org/10.1161/01.atv.17.8.1490>.
27. Russell DW. UCLA Loneliness Scale (Version 3): reliability, validity, and factor structure. *J Pers Assess*. 1996;66(1):20–40. [https://doi.org/10.1207/s15327752jpa6601\\_2](https://doi.org/10.1207/s15327752jpa6601_2).
28. Teo AR, Choi H, Andrea SB, et al. Does mode of contact with different types of social relationships predict depression in older adults? Evidence from a nationally representative survey. *J Am Geriatr Soc*. 2015;63(10):2014–2022. <https://doi.org/10.1111/jgs.13667>.

**Appendix**  
**Volunteering and Subsequent Health and Well-being in Older Adults:**  
**An Outcome-wide Longitudinal Approach**  
**Kim et al.**

**Appendix Table 1.** Volunteering and Subsequent Health and Well-being (Health and Retirement Study [HRS]: N=12,998; 5 Categories of Volunteering)<sup>a,b,c,d</sup>

| Variable                         | Hours of volunteering/year         |                                                  |                                                   |                                                     |                                                |
|----------------------------------|------------------------------------|--------------------------------------------------|---------------------------------------------------|-----------------------------------------------------|------------------------------------------------|
|                                  | 0 Hours/Year<br>(n=8,064)<br>(ref) | 1–49 Hours/Year<br>(n=1,794)<br>RR/OR/β (95% CI) | 50–99 Hours/Year<br>(n=1,150)<br>RR/OR/β (95% CI) | 100–199 Hours/Year<br>(n=1,990)<br>RR/OR/β (95% CI) | ≥200 Hours/Year<br>(n=880)<br>RR/OR/β (95% CI) |
| <b>Physical health</b>           |                                    |                                                  |                                                   |                                                     |                                                |
| All-cause mortality              | 1.00                               | 0.86 (0.71, 1.04)                                | <b>0.72 (0.55, 0.93)*</b>                         | <b>0.54 (0.40, 0.72)***</b>                         | <b>0.57 (0.40, 0.82)**</b>                     |
| Number of chronic conditions     | 0.00                               | −0.03 (−0.06, 0.00)                              | <b>−0.08 (−0.12, −0.04)***</b>                    | −0.04 (−0.08, 0.01)                                 | −0.02 (−0.07, 0.03)                            |
| Diabetes                         | 1.00                               | 0.99 (0.88, 1.10)                                | 0.91 (0.79, 1.05)                                 | 0.89 (0.77, 1.04)                                   | 0.92 (0.77, 1.10)                              |
| Hypertension                     | 1.00                               | 0.98 (0.92, 1.06)                                | 0.97 (0.89, 1.06)                                 | 1.02 (0.93, 1.11)                                   | 0.98 (0.87, 1.09)                              |
| Stroke                           | 1.00                               | 1.08 (0.91, 1.29)                                | 0.87 (0.67, 1.12)                                 | 0.90 (0.71, 1.16)                                   | 0.90 (0.68, 1.19)                              |
| Cancer                           | 1.00                               | 0.99 (0.87, 1.12)                                | 0.90 (0.77, 1.05)                                 | 0.95 (0.82, 1.11)                                   | 0.87 (0.72, 1.05)                              |
| Heart disease                    | 1.00                               | 1.01 (0.90, 1.12)                                | 0.94 (0.82, 1.07)                                 | 0.96 (0.84, 1.10)                                   | 0.93 (0.79, 1.08)                              |
| Lung disease                     | 1.00                               | 0.91 (0.76, 1.08)                                | 0.96 (0.77, 1.20)                                 | 1.06 (0.85, 1.33)                                   | 1.08 (0.83, 1.41)                              |
| Arthritis                        | 1.00                               | 0.98 (0.92, 1.06)                                | 0.99 (0.91, 1.08)                                 | 1.01 (0.92, 1.10)                                   | 1.05 (0.95, 1.16)                              |
| Overweight/Obesity               | 1.00                               | 0.98 (0.92, 1.05)                                | 0.99 (0.90, 1.08)                                 | 1.00 (0.91, 1.09)                                   | 1.03 (0.93, 1.14)                              |
| Physical functioning limitations | 1.00                               | 0.99 (0.89, 1.10)                                | <b>0.84 (0.72, 0.98)*</b>                         | <b>0.83 (0.70, 0.99)*</b>                           | <b>0.81 (0.67, 0.99)*</b>                      |
| Cognitive impairment             | 1.00                               | 0.91 (0.79, 1.06)                                | <b>0.83 (0.70, 0.98)*</b>                         | 0.90 (0.75, 1.09)                                   | <b>0.80 (0.64, 1.00)*</b>                      |
| Chronic pain                     | 1.00                               | 0.99 (0.91, 1.08)                                | 0.96 (0.86, 1.08)                                 | 0.98 (0.87, 1.11)                                   | 0.89 (0.76, 1.03)                              |
| Self-rated health                | 0.00                               | 0.04 (0.00, 0.09)                                | <b>0.09 (0.03, 0.15)**</b>                        | <b>0.14 (0.08, 0.20)***</b>                         | <b>0.13 (0.04, 0.21)**</b>                     |
| <b>Health behaviors</b>          |                                    |                                                  |                                                   |                                                     |                                                |
| Binge drinking                   | 1.00                               | 0.98 (0.72, 1.32)                                | 0.98 (0.64, 1.49)                                 | 0.94 (0.60, 1.49)                                   | 0.88 (0.50, 1.57)                              |
| Smoking                          | 1.00                               | 0.79 (0.58, 1.09)                                | 0.87 (0.60, 1.27)                                 | 0.92 (0.56, 1.49)                                   | 0.86 (0.49, 1.51)                              |
| Frequent physical activity       | 1.00                               | 1.04 (0.96, 1.13)                                | 1.06 (0.96, 1.17)                                 | <b>1.13 (1.02, 1.24)*</b>                           | <b>1.12 (1.00, 1.26)*</b>                      |
| Sleep problems                   | 1.00                               | 0.99 (0.90, 1.09)                                | 1.02 (0.91, 1.14)                                 | 0.98 (0.86, 1.10)                                   | 1.02 (0.89, 1.18)                              |
| <b>Psychological well-being</b>  |                                    |                                                  |                                                   |                                                     |                                                |
| Positive affect                  | 0.00                               | 0.03 (−0.02, 0.09)                               | <b>0.09 (0.03, 0.15)**</b>                        | <b>0.14 (0.08, 0.20)***</b>                         | <b>0.13 (0.06, 0.20)***</b>                    |
| Life satisfaction                | 0.00                               | 0.00 (−0.05, 0.05)                               | −0.02 (−0.10, 0.06)                               | 0.06 (−0.02, 0.15)                                  | 0.04 (−0.07, 0.14)                             |
| Optimism                         | 0.00                               | 0.03 (−0.02, 0.08)                               | 0.03 (−0.02, 0.09)                                | <b>0.06 (0.00, 0.13)*</b>                           | 0.05 (−0.04, 0.14)                             |
| Purpose in life                  | 0.00                               | 0.03 (−0.02, 0.09)                               | 0.06 (0.00, 0.13)                                 | <b>0.10 (0.04, 0.16)**</b>                          | <b>0.13 (0.05, 0.21)**</b>                     |
| Mastery                          | 0.00                               | 0.01 (−0.05, 0.07)                               | −0.01 (−0.08, 0.07)                               | 0.09 (−0.01, 0.19)                                  | 0.08 (−0.03, 0.18)                             |
| Health mastery                   | 0.00                               | 0.01 (−0.05, 0.07)                               | 0.01 (−0.08, 0.10)                                | 0.06 (−0.03, 0.16)                                  | 0.04 (−0.08, 0.16)                             |
| Financial mastery                | 0.00                               | 0.01 (−0.05, 0.08)                               | 0.03 (−0.04, 0.11)                                | 0.10 (−0.02, 0.21)                                  | 0.06 (−0.07, 0.20)                             |
| <b>Psychological distress</b>    |                                    |                                                  |                                                   |                                                     |                                                |
| Depression                       | 1.00                               | 0.92 (0.77, 1.09)                                | 0.91 (0.71, 1.18)                                 | 0.91 (0.70, 1.20)                                   | 0.91 (0.67, 1.22)                              |
| Depressive symptoms              | 0.00                               | −0.05 (−0.09, 0.00)                              | <b>−0.06 (−0.12, −0.00)*</b>                      | −0.05 (−0.12, 0.01)                                 | −0.06 (−0.14, 0.01)                            |
| Hopelessness                     | 0.00                               | −0.04 (−0.09, 0.01)                              | −0.05 (−0.11, 0.02)                               | <b>−0.08 (−0.15, −0.01)*</b>                        | <b>−0.08 (−0.16, −0.01)*</b>                   |
| Negative affect                  | 0.00                               | 0.02 (−0.04, 0.07)                               | 0.01 (−0.06, 0.08)                                | −0.02 (−0.10, 0.07)                                 | 0.00 (−0.08, 0.08)                             |
| Perceived constraints            | 0.00                               | −0.03 (−0.09, 0.03)                              | −0.02 (−0.10, 0.05)                               | −0.06 (−0.15, 0.03)                                 | −0.07 (−0.16, 0.03)                            |

**Appendix**  
**Volunteering and Subsequent Health and Well-being in Older Adults:**  
**An Outcome-wide Longitudinal Approach**  
**Kim et al.**

| Social factors                |      |                           |                            |                              |                             |
|-------------------------------|------|---------------------------|----------------------------|------------------------------|-----------------------------|
| Loneliness                    | 0.00 | 0.00 (-0.05, 0.04)        | -0.06 (-0.11, 0.01)        | <b>-0.07 (-0.14, -0.00)*</b> | -0.06 (-0.15, 0.03)         |
| Contact children <1x/week     | 1.00 | 0.95 (0.85, 1.05)         | 0.94 (0.81, 1.09)          | 1.02 (0.88, 1.20)            | 0.95 (0.78, 1.15)           |
| Contact other family <1x/week | 1.00 | 0.99 (0.92, 1.08)         | 1.00 (0.89, 1.12)          | 1.06 (0.95, 1.17)            | 1.08 (0.96, 1.22)           |
| Contact friends <1x/week      | 1.00 | <b>0.88 (0.79, 0.98)*</b> | <b>0.82 (0.72, 0.94)**</b> | <b>0.78 (0.68, 0.89)***</b>  | <b>0.61 (0.50, 0.74)***</b> |

*Notes:* Boldface indicates statistical significance (\* $p < 0.05$  before Bonferroni correction; \*\* $p < 0.01$  before Bonferroni correction; \*\*\* $p < 0.05$  after Bonferroni correction [the  $p$ -value cutoff for Bonferroni correction is  $p = 0.05/34$  outcomes =  $p < 0.001$ ]).

<sup>a</sup>If the reference value is “1,” the effect estimate is OR or RR; if the reference value is “0,” the effect estimate is  $\beta$ .

<sup>b</sup>The analytic sample was restricted to those who had participated in the baseline wave ( $t_1$ ; 2010 or 2012). Multiple imputation was performed to impute missing data on the exposure, covariates, and outcomes. All models controlled for sociodemographic characteristics (age, sex, race/ethnicity, marital status, annual household income, total wealth, level of education, employment status, health insurance, geographic region), pre-baseline childhood abuse, pre-baseline religious service attendance, pre-baseline values of the outcome variables (diabetes, hypertension, stroke, cancer, heart disease, lung disease, arthritis, overweight/obesity, physical functioning limitations, cognitive impairment, chronic pain, self-rated health, binge drinking, current smoking status, physical activity, sleep problems, positive affect, life satisfaction, optimism, purpose in life, mastery, health mastery, financial mastery, depressive symptoms, hopelessness, negative affect, perceived constraints, loneliness, living with spouse/partner, contact children <1x/week, contact other family <1x/week, contact friends <1x/week), personality factors (openness, conscientiousness, extraversion, agreeableness, neuroticism) and the pre-baseline value of the exposure. These variables were controlled for in the wave pre-baseline to the exposure assessment (in  $t_0$ ; 2006 or 2008).

<sup>c</sup>An outcome-wide analytic approach was used, and a separate model for each outcome was run. A different type of model was run depending on the nature of the outcome: (1) for each binary outcome with a prevalence of  $\geq 10\%$ , a generalized linear model (with a log link and Poisson distribution) was used to estimate a RR; (2) for each binary outcome with a prevalence of  $< 10\%$ , a logistic regression model was used to estimate an OR; and (3) for each continuous outcome, a linear regression model was used to estimate a  $\beta$ .

<sup>d</sup>All continuous outcomes were standardized (mean=0; SD=1), and  $\beta$  was the standardized effect size.

**Appendix**  
**Volunteering and Subsequent Health and Well-being in Older Adults:**  
**An Outcome-wide Longitudinal Approach**  
**Kim et al.**

**Appendix Table 2.** Change in Volunteering From the Pre-Baseline Wave (t0) to the Baseline Wave (t1)

|                                                                                                                                                  |
|--------------------------------------------------------------------------------------------------------------------------------------------------|
| Among people volunteering 0 hours/year at the pre-baseline wave (t0), this is how many hours they volunteered/year at the baseline wave (t1)     |
| 0 hours/year=83.1%                                                                                                                               |
| 1–49 hours/year=9.4%                                                                                                                             |
| 50–99 hours/year=3.9%                                                                                                                            |
| ≥100 hours/year=3.6%                                                                                                                             |
| Among people volunteering 1–49 hours/year at the pre-baseline wave (t0), this is how many hours they volunteered/year at the baseline wave (t1)  |
| 0 hours/year=43.4%                                                                                                                               |
| 1–49 hours/year=30.8%                                                                                                                            |
| 50–99 hours/year=12.6%                                                                                                                           |
| ≥100 hours/year=13.2%                                                                                                                            |
| Among people volunteering 50–99 hours/year at the pre-baseline wave (t0), this is how many hours they volunteered/year at the baseline wave (t1) |
| 0 hours/year=30.2%                                                                                                                               |
| 1–49 hours/year=21.5%                                                                                                                            |
| 50–99 hours/year=23.3%                                                                                                                           |
| ≥100 hours/year=25.1%                                                                                                                            |
| Among people volunteering ≥100 hours/year at the pre-baseline wave (t0), this is how many hours they volunteered/year at the baseline wave (t1)  |
| 0 hours/year=16.7%                                                                                                                               |
| 1–49 hours/year=13.4%                                                                                                                            |
| 50–99 hours/year=16.4%                                                                                                                           |
| ≥100 hours/year=53.5%                                                                                                                            |

**Appendix**  
**Volunteering and Subsequent Health and Well-being in Older Adults:**  
**An Outcome-wide Longitudinal Approach**  
**Kim et al.**

**Appendix Table 3.** Volunteering and Subsequent Health and Well-being (After Adjustment for Conventional Covariates or All Covariates; Health and Retirement Study [HRS]: N=12,998)<sup>a,b,c</sup>

| Variable                                      | Hours of volunteering/year         |                                                                                    |                                                                           |
|-----------------------------------------------|------------------------------------|------------------------------------------------------------------------------------|---------------------------------------------------------------------------|
|                                               | 0 Hours/Year<br>(n=8,064)<br>(ref) | Conventionally-adjusted models <sup>d</sup><br>≥100 Hours/Year<br>RR/OR/β (95% CI) | Fully-adjusted models <sup>e</sup><br>≥100 Hours/Year<br>RR/OR/β (95% CI) |
| <b>Physical health</b>                        |                                    |                                                                                    |                                                                           |
| All-cause mortality                           | 1.00                               | <b>0.48 (0.39, 0.59)***</b>                                                        | <b>0.56 (0.44, 0.71)***</b>                                               |
| Number of chronic conditions                  | 0.00                               | <b>-0.10 (-0.15, -0.05)***</b>                                                     | -0.03 (-0.07, 0.01)                                                       |
| Diabetes <sup>f</sup>                         | 1.00                               | 0.89 (0.67, 1.17)                                                                  | 0.96 (0.70, 1.32)                                                         |
| Hypertension <sup>g</sup>                     | 1.00                               | 0.97 (0.78, 1.20)                                                                  | 1.08 (0.97, 1.20)                                                         |
| Stroke <sup>h</sup>                           | 1.00                               | 0.72 (0.51, 1.03)                                                                  | 0.82 (0.53, 1.27)                                                         |
| Cancer <sup>i</sup>                           | 1.00                               | 0.94 (0.73, 1.19)                                                                  | 0.84 (0.62, 1.14)                                                         |
| Heart disease <sup>j</sup>                    | 1.00                               | 0.96 (0.78, 1.17)                                                                  | 0.94 (0.73, 1.21)                                                         |
| Lung disease <sup>k</sup>                     | 1.00                               | 0.93 (0.69, 1.25)                                                                  | <b>1.54 (1.09, 2.19)*</b>                                                 |
| Arthritis <sup>l</sup>                        | 1.00                               | <b>1.24 (1.01, 1.52)*</b>                                                          | <b>1.34 (1.03, 1.73)*</b>                                                 |
| Overweight/Obesity <sup>m</sup>               | 1.00                               | 0.93 (0.72, 1.21)                                                                  | 0.88 (0.64, 1.23)                                                         |
| Physical functioning limitations <sup>n</sup> | 1.00                               | <b>0.66 (0.50, 0.86)**</b>                                                         | 0.84 (0.67, 1.06)                                                         |
| Cognitive impairment <sup>o</sup>             | 1.00                               | <b>0.78 (0.64, 0.95)*</b>                                                          | 0.91 (0.73, 1.13)                                                         |
| Chronic pain <sup>p</sup>                     | 1.00                               | 0.94 (0.81, 1.07)                                                                  | 0.99 (0.83, 1.18)                                                         |
| Self-rated health                             | 0.00                               | <b>0.30 (0.26, 0.35)***</b>                                                        | <b>0.14 (0.08, 0.19)***</b>                                               |
| <b>Health behaviors</b>                       |                                    |                                                                                    |                                                                           |
| Binge drinking                                | 1.00                               | <b>0.65 (0.52, 0.83)**</b>                                                         | 0.92 (0.58, 1.48)                                                         |
| Smoking                                       | 1.00                               | <b>0.47 (0.37, 0.61)***</b>                                                        | 0.89 (0.58, 1.36)                                                         |
| Frequent physical activity                    | 1.00                               | <b>1.29 (1.20, 1.38)***</b>                                                        | <b>1.12 (1.03, 1.23)**</b>                                                |
| Sleep problems                                | 1.00                               | <b>0.85 (0.78, 0.92)***</b>                                                        | 0.99 (0.89, 1.11)                                                         |
| <b>Psychological well-being</b>               |                                    |                                                                                    |                                                                           |
| Positive affect                               | 0.00                               | <b>0.45 (0.40, 0.50)***</b>                                                        | <b>0.13 (0.08, 0.19)***</b>                                               |
| Life satisfaction                             | 0.00                               | <b>0.29 (0.24, 0.35)***</b>                                                        | 0.05 (-0.03, 0.13)                                                        |
| Optimism                                      | 0.00                               | <b>0.38 (0.33, 0.43)***</b>                                                        | <b>0.06 (0.00, 0.12)*</b>                                                 |
| Purpose in life                               | 0.00                               | <b>0.37 (0.32, 0.42)***</b>                                                        | <b>0.11 (0.05, 0.16)***</b>                                               |
| Mastery                                       | 0.00                               | <b>0.21 (0.14, 0.29)***</b>                                                        | 0.08 (-0.01, 0.17)                                                        |
| Health mastery                                | 0.00                               | <b>0.17 (0.10, 0.24)***</b>                                                        | 0.05 (-0.04, 0.14)                                                        |

**Appendix**  
**Volunteering and Subsequent Health and Well-being in Older Adults:**  
**An Outcome-wide Longitudinal Approach**  
**Kim et al.**

|                               |      |                                |                              |
|-------------------------------|------|--------------------------------|------------------------------|
| Financial mastery             | 0.00 | <b>0.15 (0.07, 0.23)**</b>     | 0.08 (-0.03, 0.19)           |
| <b>Psychological distress</b> |      |                                |                              |
| Depression                    | 1.00 | <b>0.59 (0.49, 0.71)***</b>    | 0.90 (0.73, 1.12)            |
| Depressive symptoms           | 0.00 | <b>-0.25 (-0.31, -0.20)***</b> | <b>-0.06 (-0.11, 0.00)*</b>  |
| Hopelessness                  | 0.00 | <b>-0.34 (-0.39, -0.29)***</b> | <b>-0.08 (-0.14, -0.02)*</b> |
| Negative affect               | 0.00 | <b>-0.21 (-0.26, -0.15)***</b> | -0.01 (-0.08, 0.06)          |
| Perceived constraints         | 0.00 | <b>-0.26 (-0.31, -0.20)***</b> | -0.06 (-0.13, 0.02)          |
| <b>Social factors</b>         |      |                                |                              |
| Loneliness                    | 0.00 | <b>-0.24 (-0.30, -0.19)***</b> | <b>-0.06 (-0.13, -0.00)*</b> |
| Contact children <1x/week     | 1.00 | 0.90 (0.82, 1.00)              | 0.99 (0.86, 1.13)            |
| Contact other family <1x/week | 1.00 | 1.02 (0.94, 1.10)              | 1.07 (0.98, 1.17)            |
| Contact friends <1x/week      | 1.00 | <b>0.57 (0.51, 0.63)***</b>    | <b>0.71 (0.62, 0.80)***</b>  |

*Notes:* Boldface indicates statistical significance (\* $p < 0.05$  before Bonferroni correction; \*\* $p < 0.01$  before Bonferroni correction; \*\*\* $p < 0.05$  after Bonferroni correction [the  $p$ -value cutoff for Bonferroni correction is  $p = 0.05/34$  outcomes =  $p < 0.001$ ]).

<sup>a</sup>If the reference value is “1,” the effect estimate is OR or RR; if the reference value is “0,” the effect estimate is  $\beta$ .

<sup>b</sup>An outcome-wide analytic approach was used, and a separate model for each outcome was run. A different type of model was run depending on the nature of the outcome: (1) for each binary outcome with a prevalence of  $\geq 10\%$ , a generalized linear model (with a log link and Poisson distribution) was used to estimate a RR; (2) for each binary outcome with a prevalence of  $< 10\%$ , a logistic regression model was used to estimate an OR; and (3) for each continuous outcome, a linear regression model was used to estimate a  $\beta$ .

<sup>c</sup>All continuous outcomes were standardized (mean=0; SD=1), and  $\beta$  was the standardized effect size.

<sup>d</sup>The analytic sample was restricted to those who had participated in the baseline wave ( $t_1$ ; 2010 or 2012). Multiple imputation was performed to impute missing data on the exposure, covariates, and outcomes. All models controlled for sociodemographic characteristics (age, sex, race/ethnicity, marital status, annual household income, total wealth, level of education). These variables were controlled for in the pre-baseline wave ( $t_0$ ; in 2006 or 2008).

<sup>e</sup>The analytic sample was restricted to those who had participated in the baseline wave ( $t_1$ ; 2010 or 2012). Multiple imputation was performed to impute missing data on the exposure, covariates, and outcomes. All models controlled for sociodemographic characteristics (age, sex, race/ethnicity, marital status, annual household income, total wealth, level of education, employment status, health insurance, geographic region), pre-baseline childhood abuse, pre-baseline religious service attendance, pre-baseline values of the outcome variables (diabetes, hypertension, stroke, cancer, heart disease, lung disease, arthritis, overweight/obesity, physical functioning limitations, cognitive impairment, chronic pain, self-rated health, binge drinking, current smoking status, physical activity, sleep problems, positive affect, life satisfaction, optimism, purpose in life, mastery, health mastery, financial mastery, depressive symptoms, hopelessness, negative affect, perceived constraints, loneliness, living with spouse/partner, contact children <1x/week,

**Appendix**  
**Volunteering and Subsequent Health and Well-being in Older Adults:**  
**An Outcome-wide Longitudinal Approach**  
**Kim et al.**

contact other family <1x/week, contact friends <1x/week), personality factors (openness, conscientiousness, extraversion, agreeableness, neuroticism) and the pre-baseline value of the exposure. These variables were controlled for in the wave pre-baseline to the exposure assessment (in  $t_0$ ; 2006 or 2008).

<sup>f</sup>Includes only study participants with no history of diabetes (n=10,033).

<sup>g</sup>Includes only study participants with no history of hypertension (n=5,147).

<sup>h</sup>Includes only study participants with no history of stroke (n=11,906).

<sup>i</sup>Includes only study participants with no history of cancer (n=10,832).

<sup>j</sup>Includes only study participants with no history of heart disease (n=9,698).

<sup>k</sup>Includes only study participants with no history of lung disease (n=11,676).

<sup>l</sup>Includes only study participants with no history of arthritis (n=5,003).

<sup>m</sup>Includes only study participants who were not overweight/obese (n=3,754).

<sup>n</sup>Includes only study participants who did not have physical functioning limitations (n=9,791).

<sup>o</sup>Includes only study participants who did not have cognitive impairment (n=10,406).

<sup>p</sup>Includes only study participants who did not have chronic pain (n=8,287).

**Appendix**  
**Volunteering and Subsequent Health and Well-being in Older Adults:**  
**An Outcome-wide Longitudinal Approach**  
**Kim et al.**

**Appendix Table 4.** Complete-Case Analyses: Volunteering and Subsequent Health and Well-being (Health and Retirement Study [HRS]: N ranged from: 5,581 to 8,474)<sup>a,b,c,d</sup>

| Variable                         | Hours of volunteering/year |                                     |                                      |                                     |
|----------------------------------|----------------------------|-------------------------------------|--------------------------------------|-------------------------------------|
|                                  | 0 Hours/Year<br>(ref)      | 1–49 Hours/Year<br>RR/OR/β (95% CI) | 50–99 Hours/Year<br>RR/OR/β (95% CI) | ≥100 Hours/Year<br>RR/OR/β (95% CI) |
| <b>Physical health</b>           |                            |                                     |                                      |                                     |
| All-cause mortality              | 1.00                       | 0.89 (0.71, 1.12)                   | <b>0.77 (0.57, 1.03)</b>             | <b>0.56 (0.42, 0.74)***</b>         |
| Number of chronic conditions     | 0.00                       | −0.03 (−0.08, 0.01)                 | <b>−0.08 (−0.13, −0.03)**</b>        | 0.00 (−0.05, 0.05)                  |
| Diabetes                         | 1.00                       | 0.97 (0.84, 1.12)                   | 0.91 (0.75, 1.09)                    | 0.94 (0.79, 1.12)                   |
| Hypertension                     | 1.00                       | 0.99 (0.90, 1.08)                   | 0.96 (0.85, 1.07)                    | 1.01 (0.92, 1.12)                   |
| Stroke                           | 1.00                       | 1.21 (0.96, 1.53)                   | 0.98 (0.70, 1.36)                    | 0.97 (0.74, 1.27)                   |
| Cancer                           | 1.00                       | 0.98 (0.84, 1.16)                   | 0.90 (0.74, 1.11)                    | 0.95 (0.80, 1.13)                   |
| Heart disease                    | 1.00                       | 1.01 (0.88, 1.15)                   | 0.94 (0.79, 1.11)                    | 0.97 (0.83, 1.12)                   |
| Lung disease                     | 1.00                       | 0.86 (0.67, 1.10)                   | 1.01 (0.76, 1.35)                    | 1.11 (0.86, 1.43)                   |
| Arthritis                        | 1.00                       | 0.97 (0.89, 1.07)                   | 0.99 (0.89, 1.10)                    | 1.03 (0.93, 1.13)                   |
| Overweight/Obesity               | 1.00                       | 0.97 (0.89, 1.07)                   | 0.98 (0.88, 1.09)                    | 1.01 (0.92, 1.12)                   |
| Physical functioning limitations | 1.00                       | 1.00 (0.86, 1.16)                   | 0.86 (0.71, 1.05)                    | <b>0.77 (0.64, 0.93)**</b>          |
| Cognitive impairment             | 1.00                       | 0.99 (0.82, 1.18)                   | 0.85 (0.68, 1.07)                    | 0.83 (0.67, 1.03)                   |
| Chronic pain                     | 1.00                       | 1.02 (0.90, 1.15)                   | 1.00 (0.87, 1.16)                    | 0.96 (0.84, 1.10)                   |
| Self-rated health                | 0.00                       | 0.05 (−0.01, 0.11)                  | <b>0.09 (0.02, 0.16)*</b>            | <b>0.17 (0.11, 0.24)***</b>         |
| <b>Health behaviors</b>          |                            |                                     |                                      |                                     |
| Binge drinking                   | 1.00                       | 0.99 (0.74, 1.32)                   | 0.95 (0.66, 1.36)                    | 0.75 (0.54, 1.06)                   |
| Smoking                          | 1.00                       | <b>0.60 (0.37, 1.00)*</b>           | 0.83 (0.47, 1.48)                    | 0.88 (0.51, 1.51)                   |
| Frequent physical activity       | 1.00                       | 1.01 (0.91, 1.12)                   | 1.05 (0.93, 1.19)                    | <b>1.13 (1.01, 1.27)*</b>           |
| Sleep problems                   | 1.00                       | 0.99 (0.88, 1.12)                   | 1.09 (0.95, 1.26)                    | 0.99 (0.87, 1.14)                   |
| <b>Psychological well-being</b>  |                            |                                     |                                      |                                     |
| Positive affect                  | 0.00                       | 0.04 (−0.02, 0.10)                  | <b>0.09 (0.01, 0.16)*</b>            | <b>0.14 (0.07, 0.21)***</b>         |
| Life satisfaction                | 0.00                       | 0.01 (−0.05, 0.08)                  | −0.04 (−0.12, 0.03)                  | <b>0.08 (0.01, 0.15)*</b>           |
| Optimism                         | 0.00                       | 0.02 (−0.04, 0.08)                  | 0.02 (−0.05, 0.10)                   | <b>0.08 (0.01, 0.15)*</b>           |
| Purpose in life                  | 0.00                       | <b>0.09 (0.03, 0.15)**</b>          | <b>0.09 (0.02, 0.17)*</b>            | <b>0.17 (0.10, 0.24)***</b>         |
| Mastery                          | 0.00                       | 0.05 (−0.02, 0.12)                  | −0.01 (−0.09, 0.08)                  | <b>0.10 (0.03, 0.18)**</b>          |
| Health mastery                   | 0.00                       | 0.06 (−0.01, 0.13)                  | −0.02 (−0.10, 0.06)                  | 0.07 (−0.01, 0.15)                  |
| Financial mastery                | 0.00                       | 0.05 (−0.02, 0.12)                  | 0.06 (−0.03, 0.14)                   | <b>0.10 (0.02, 0.18)*</b>           |

**Appendix**  
**Volunteering and Subsequent Health and Well-being in Older Adults:**  
**An Outcome-wide Longitudinal Approach**  
**Kim et al.**

| Psychological distress        |      |                               |                           |                               |
|-------------------------------|------|-------------------------------|---------------------------|-------------------------------|
| Depression                    | 1.00 | 0.79 (0.61, 1.02)             | 0.93 (0.69, 1.26)         | 0.84 (0.63, 1.12)             |
| Depressive symptoms           | 0.00 | <b>-0.08 (-0.14, -0.02)**</b> | -0.06 (-0.13, 0.01)       | -0.06 (-0.13, 0.00)           |
| Hopelessness                  | 0.00 | -0.05 (-0.12, 0.01)           | -0.04 (-0.12, 0.04)       | <b>-0.10 (-0.17, -0.03)**</b> |
| Negative affect               | 0.00 | 0.01 (-0.05, 0.07)            | 0.02 (-0.06, 0.09)        | -0.01 (-0.08, 0.06)           |
| Perceived constraints         | 0.00 | <b>-0.07 (-0.13, 0.00)*</b>   | -0.05 (-0.13, 0.02)       | <b>-0.08 (-0.15, -0.01)*</b>  |
| Social factors                |      |                               |                           |                               |
| Loneliness                    | 0.00 | -0.03 (-0.10, 0.03)           | -0.07 (-0.15, 0.01)       | <b>-0.08 (-0.16, -0.02)*</b>  |
| Contact children <1x/week     | 1.00 | 0.95 (0.82, 1.11)             | 0.93 (0.77, 1.13)         | 0.98 (0.83, 1.15)             |
| Contact other family <1x/week | 1.00 | 1.01 (0.90, 1.13)             | 1.01 (0.88, 1.16)         | 1.07 (0.94, 1.20)             |
| Contact friends <1x/week      | 1.00 | <b>0.87 (0.76, 0.99)*</b>     | <b>0.81 (0.69, 0.96)*</b> | <b>0.71 (0.61, 0.84)***</b>   |

Notes: Boldface indicates statistical significance (\* $p < 0.05$  before Bonferroni correction; \*\* $p < 0.01$  before Bonferroni correction; \*\*\* $p < 0.05$  after Bonferroni correction [the  $p$ -value cutoff for Bonferroni correction is  $p = 0.05/34$  outcomes =  $p < 0.001$ ]).

<sup>a</sup>If the reference value is “1,” the effect estimate is OR or RR; if the reference value is “0,” the effect estimate is  $\beta$ .

<sup>b</sup>The analytic sample was restricted to those who had participated in the baseline wave ( $t_1$ ; 2010 or 2012). Multiple imputation was performed to impute missing data on the exposure, covariates, and outcomes. All models controlled for sociodemographic characteristics (age, sex, race/ethnicity, marital status, annual household income, total wealth, level of education, employment status, health insurance, geographic region), pre-baseline childhood abuse, pre-baseline religious service attendance, pre-baseline values of the outcome variables (diabetes, hypertension, stroke, cancer, heart disease, lung disease, arthritis, overweight/obesity, physical functioning limitations, cognitive impairment, chronic pain, self-rated health, binge drinking, current smoking status, physical activity, sleep problems, positive affect, life satisfaction, optimism, purpose in life, mastery, health mastery, financial mastery, depressive symptoms, hopelessness, negative affect, perceived constraints, loneliness, living with spouse/partner, contact children <1x/week, contact other family <1x/week, contact friends <1x/week), personality factors (openness, conscientiousness, extraversion, agreeableness, neuroticism) and the pre-baseline value of the exposure. These variables were controlled for in the wave pre-baseline to the exposure assessment (in  $t_0$ ; 2006 or 2008).

<sup>c</sup>An outcome-wide analytic approach was used, and a separate model for each outcome was run. A different type of model was run depending on the nature of the outcome: (1) for each binary outcome with a prevalence of  $\geq 10\%$ , a generalized linear model (with a log link and Poisson distribution) was used to estimate a RR; (2) for each binary outcome with a prevalence of  $< 10\%$ , a logistic regression model was used to estimate an OR; and (3) for each continuous outcome, a linear regression model was used to estimate a  $\beta$ .

<sup>d</sup>All continuous outcomes were standardized (mean=0; SD=1), and  $\beta$  was the standardized effect size.

**Appendix**  
**Volunteering and Subsequent Health and Well-being in Older Adults:**  
**An Outcome-wide Longitudinal Approach**  
**Kim et al.**

**Appendix Table 5.** Volunteering and Subsequent All-Cause Mortality (Table Displaying Coefficient Estimates for All Covariates [HRS]: N=12,998)<sup>a,b</sup>

| <b>Factor</b>                                               | <b>RR (95% CI)</b> |
|-------------------------------------------------------------|--------------------|
| <b>Volunteering (Wave 2 exposure variable)</b>              |                    |
| 0 hours/year                                                | 1.00               |
| 1–49 hours/year                                             | 0.86 (0.71, 1.04)  |
| 50–99 hours/year                                            | 0.72 (0.55, 0.93)  |
| ≥100 hours/year                                             | 0.56 (0.44, 0.71)  |
| <b>Sociodemographic characteristics (Wave 1 covariates)</b> |                    |
| Age (continuous)                                            | 1.08 (1.07, 1.08)  |
| <b>Sex</b>                                                  |                    |
| Male                                                        | 1.00               |
| Female                                                      | 0.67 (0.59, 0.77)  |
| <b>Race/Ethnicity</b>                                       |                    |
| White                                                       | 1.00               |
| African American                                            | 0.95 (0.79, 1.13)  |
| Hispanic                                                    | 0.69 (0.54, 0.89)  |
| Other                                                       | 0.78 (0.52, 1.16)  |
| <b>Marital status</b>                                       |                    |
| Not married                                                 | 1.00               |
| Married                                                     | 1.15 (0.87, 1.52)  |
| <b>Annual household income</b>                              |                    |
| <\$50,000                                                   | 1.00               |
| \$50,000–\$74,999                                           | 0.97 (0.79, 1.18)  |
| \$75,000–\$99,999                                           | 0.92 (0.71, 1.20)  |
| ≥100,000                                                    | 0.97 (0.77, 1.23)  |
| <b>Total wealth</b>                                         |                    |
| 1st quintile                                                | 1.00               |
| 2nd quintile                                                | 1.04 (0.88, 1.23)  |
| 3rd quintile                                                | 0.97 (0.81, 1.16)  |
| 4th quintile                                                | 0.94 (0.77, 1.15)  |
| 5th quintile                                                | 0.94 (0.75, 1.18)  |
| <b>Education</b>                                            |                    |
| No degree                                                   | 1.00               |
| GED/High school diploma                                     | 1.09 (0.94, 1.26)  |
| At least some college                                       | 0.98 (0.80, 1.20)  |
| <b>Currently employed</b>                                   |                    |
| No                                                          | 1.00               |
| Yes                                                         | 0.89 (0.76, 1.04)  |
| <b>Health insurance</b>                                     |                    |
| No                                                          | 1.00               |
| Yes                                                         | 0.78 (0.61, 1.00)  |
| <b>Geographic region</b>                                    |                    |
| Northeast                                                   | 1.00               |
| Midwest                                                     | 0.95 (0.80, 1.14)  |
| South                                                       | 1.10 (0.94, 1.29)  |

**Appendix**  
**Volunteering and Subsequent Health and Well-being in Older Adults:**  
**An Outcome-wide Longitudinal Approach**  
**Kim et al.**

|                                             |                   |
|---------------------------------------------|-------------------|
| West                                        | 1.01 (0.82, 1.24) |
| <b>Childhood abuse</b>                      |                   |
| No                                          | 1.00              |
| Yes                                         | 0.97 (0.74, 1.27) |
| <b>Religious service attendance</b>         |                   |
| None                                        | 1.00              |
| <1x/week                                    | 0.87 (0.74, 1.03) |
| ≥1x/week                                    | 1.02 (0.86, 1.20) |
| <b>Physical health (Wave 1 covariates)</b>  |                   |
| <b>Diabetes</b>                             |                   |
| No                                          | 1.00              |
| Yes                                         | 1.23 (1.08, 1.41) |
| <b>Hypertension</b>                         |                   |
| No                                          | 1.00              |
| Yes                                         | 1.18 (1.05, 1.33) |
| <b>Stroke</b>                               |                   |
| No                                          | 1.00              |
| Yes                                         | 1.22 (1.03, 1.44) |
| <b>Cancer</b>                               |                   |
| No                                          | 1.00              |
| Yes                                         | 1.34 (1.18, 1.53) |
| <b>Heart disease</b>                        |                   |
| No                                          | 1.00              |
| Yes                                         | 1.22 (1.08, 1.38) |
| <b>Lung disease</b>                         |                   |
| No                                          | 1.00              |
| Yes                                         | 1.60 (1.37, 1.86) |
| <b>Arthritis</b>                            |                   |
| No                                          | 1.00              |
| Yes                                         | 0.96 (0.84, 1.08) |
| <b>Overweight/Obesity</b>                   |                   |
| No                                          | 1.00              |
| Yes                                         | 0.99 (0.87, 1.12) |
| <b>Physical functioning limitations</b>     |                   |
| No                                          | 1.00              |
| Yes                                         | 1.32 (1.14, 1.54) |
| <b>Cognitive impairment</b>                 |                   |
| No                                          | 1.00              |
| Yes                                         | 1.09 (0.94, 1.26) |
| <b>Chronic pain</b>                         |                   |
| No                                          | 1.00              |
| Yes                                         | 0.91 (0.79, 1.04) |
| Self-rated health (continuous)              | 0.85 (0.79, 0.92) |
| <b>Health behaviors (Wave 1 covariates)</b> |                   |
| <b>Binge drinking</b>                       |                   |
| No                                          | 1.00              |

**Appendix**  
**Volunteering and Subsequent Health and Well-being in Older Adults:**  
**An Outcome-wide Longitudinal Approach**  
**Kim et al.**

|                                                     |                   |
|-----------------------------------------------------|-------------------|
| Yes                                                 | 0.97 (0.77, 1.23) |
| <b>Smoking</b>                                      |                   |
| No                                                  | 1.00              |
| Yes                                                 | 1.69 (1.44, 1.99) |
| <b>Frequent physical activity</b>                   |                   |
| No                                                  | 1.00              |
| Yes                                                 | 0.88 (0.77, 1.01) |
| <b>Sleep problems</b>                               |                   |
| No                                                  | 1.00              |
| Yes                                                 | 1.01 (0.83, 1.23) |
| <b>Psychological well-being (Wave 1 covariates)</b> |                   |
| Positive affect (continuous)                        | 1.00 (0.93, 1.08) |
| Life satisfaction (continuous)                      | 1.02 (0.95, 1.10) |
| Optimism (continuous)                               | 0.94 (0.87, 1.02) |
| Purpose in life (continuous)                        | 0.98 (0.90, 1.06) |
| Mastery (continuous)                                | 0.92 (0.95, 1.07) |
| Health mastery (continuous)                         | 0.92 (0.86, 0.98) |
| Financial mastery (continuous)                      | 1.07 (1.01, 1.15) |
| <b>Psychological distress</b>                       |                   |
| Depressive symptoms (continuous)                    | 1.03 (0.96, 1.11) |
| Hopelessness (continuous)                           | 1.05 (0.97, 1.13) |
| Negative affect (continuous)                        | 0.98 (0.90, 1.07) |
| Perceived constraints (continuous)                  | 1.00 (0.92, 1.07) |
| <b>Social factors</b>                               |                   |
| Loneliness (continuous)                             | 0.99 (0.92, 1.06) |
| <b>Contact children &lt;1x/week</b>                 |                   |
| No                                                  | 1.00              |
| Yes                                                 | 1.10 (0.96, 1.26) |
| <b>Contact other family &lt;1x/week</b>             |                   |
| No                                                  | 1.00              |
| Yes                                                 | 0.98 (0.86, 1.12) |
| <b>Contact friends &lt;1x/week</b>                  |                   |
| No                                                  | 1.00              |
| Yes                                                 | 1.09 (0.96, 1.24) |
| <b>Personality factors (Wave 1 covariates)</b>      |                   |
| Openness (continuous)                               | 1.02 (0.95, 1.09) |
| Conscientiousness (continuous)                      | 0.99 (0.93, 1.06) |
| Extraversion (continuous)                           | 1.02 (0.94, 1.10) |
| Agreeableness (continuous)                          | 1.00 (0.93, 1.08) |
| Neuroticism (continuous)                            | 0.97 (0.90, 1.04) |
| <b>Prior volunteering (Wave 1 covariate)</b>        |                   |
| 0 hours/year                                        | 1.00              |
| 1–49 hours/year                                     | 1.04 (0.86, 1.27) |
| 50–99 hours/year                                    | 1.10 (0.86, 1.38) |
| ≥100 hours/year                                     | 1.20 (0.98, 1.46) |

**Appendix**  
**Volunteering and Subsequent Health and Well-being in Older Adults:**  
**An Outcome-wide Longitudinal Approach**  
**Kim et al.**

<sup>a</sup>The analytic sample was restricted to those who had participated in the baseline wave ( $t_1$ ; 2010 or 2012). Multiple imputation was performed to impute missing data on the exposure, covariates, and the outcome. All models controlled for sociodemographic characteristics (age, sex, race/ethnicity, marital status, annual household income, total wealth, level of education, employment status, health insurance, geographic region), pre-baseline childhood abuse, pre-baseline religious service attendance, pre-baseline values of the outcome variables (diabetes, hypertension, stroke, cancer, heart disease, lung disease, arthritis, overweight/obesity, physical functioning limitations, cognitive impairment, chronic pain, self-rated health, binge drinking, current smoking status, physical activity, sleep problems, positive affect, life satisfaction, optimism, purpose in life, mastery, health mastery, financial mastery, depressive symptoms, hopelessness, negative affect, perceived constraints, loneliness, living with spouse/partner, contact children <1x/week, contact other family <1x/week, contact friends <1x/week), personality factors (openness, conscientiousness, extraversion, agreeableness, neuroticism) and the pre-baseline value of the exposure (i.e., prior volunteering). These variables were controlled for in the wave pre-baseline to the exposure assessment (in  $t_0$ ; 2006 or 2008).

<sup>b</sup>We used a generalized linear model (with a log link and Poisson distribution) to estimate a RR because the binary mortality outcome had a prevalence of  $\geq 10\%$ .
